# Supplementary material for: Effectiveness of a brief behavioural intervention to prevent weight gain over the Christmas holiday period: randomised controlled trial
Source: PubMed Central journal article supplement — BMJ. 2018 Dec 10;363:k4867. doi: 10.1136/bmj.k4867 (PMC6287121; doi:10.1136/bmj.k4867), 2018-12-10
Supplement: masf046811.ww1.pdf [file masf046811.ww1.pdf]

**Supplementary file S1: Weight record sheet, adapted 10TT (adapted from Lally et al, 2008) and example PACE information.**



Current Weight:

| Date                                                       | Weight | +/-<br>'Current Weight' |
|------------------------------------------------------------|--------|-------------------------|
|                                                            |        |                         |
|                                                            |        |                         |
|                                                            |        |                         |
|                                                            |        |                         |
|                                                            |        |                         |
|                                                            |        |                         |
|                                                            |        |                         |
|                                                            |        |                         |
| Remember to limit your weight gain to 0.5kg or 1lb         |        |                         |
|                                                            |        |                         |
|                                                            |        |                         |
|                                                            |        |                         |
|                                                            |        |                         |
|                                                            |        |                         |
|                                                            |        |                         |
|                                                            |        |                         |
| Has your weight gone up? Take caution with your portions   |        |                         |
|                                                            |        |                         |
|                                                            |        |                         |
|                                                            |        |                         |
|                                                            |        |                         |
|                                                            |        |                         |
|                                                            |        |                         |
|                                                            |        |                         |
|                                                            |        |                         |
| Look out for your weight going up. Spot it early and stop! |        |                         |
|                                                            |        |                         |
|                                                            |        |                         |
|                                                            |        |                         |
|                                                            |        |                         |

**Maximum Weight:**

[illegible]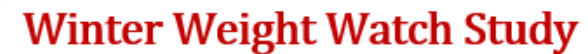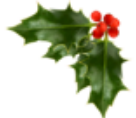

Most people in the UK are overweight because they eat too much food and don't do enough physical activity. People also naturally gain weight over time, from one year to the next. Being overweight is not good for your health and it increases your risk of serious chronic diseases including type 2 diabetes, heart disease and cancer. For these reasons it is important that we do all we can to prevent the general public from gaining too much weight.

Studies report that holidays are a very high risk period for weight gain and most of us will gain weight. On average, people will gain between 0.5 to 1.0 kg (1-2 pounds) over the Christmas holidays that they do not lose afterwards. Over 10 years this amounts to between 5 to 10kgs (11-22lbs) in weight gain.

Changes in routine, taking less physical activity, parties, increased alcohol consumption and food temptation leading to over consumption all contribute to a greater risk of weight gain over the Christmas period. Attending more social events also encourage over eating and drinking, with more alcohol, snack foods and larger portions on offer.

## 1. Ten Top Tips

Inside this leaflet are 'Ten Top Tips' which we would like you to follow to limit your weight gain. As examples, this leaflet also gives you information about the amount of walking and running you need to do to burn off calories from popular Christmas food and drinks.

We would also like you to tell your family and friends about the study so that they can support you to limit your weight gain.

We would like you to weigh yourself at least twice a week, ideally every day, and record your weight on the back of this leaflet.

We would like you to gain **no more than 0.5 kg (1 lb)** above your weight (as measured today) over Christmas. Your maximum weight is written on the back page of this leaflet in the **Maximum Weight** box.

We hope you have a healthy and happy holiday period and look forward to hearing how you got on in the New Year.

Contact Details: Tel: 0121 414 6422      0121 415 8725  
Email: [winterweight@contacts.bham.ac.uk](mailto:winterweight@contacts.bham.ac.uk)

**1 Keep to your meal routine:**  
Try to eat roughly the same time each day, whether this is two or five times a day.

**2 Go reduced fat:**  
Choose reduced fat foods (e.g. dairy foods, spreads, salad dressings) where you can. Use high fat food sparingly (e.g. butter and oils), if at all.

**3 Walk off the weight:**  
Walk 10,000 steps each day (equivalent to 60-90 min moderate activity). You can use a pedometer to help you count the steps. Start by counting your steps, then building up more each day with an ultimate target of 10,000.

**4 Pack a healthy snack:**  
If you snack, chose a healthy option such as fresh fruit or low calorie yogurts instead of chocolate or crisps.

**5 Learn the labels:**  
Be careful about food claims. Check the fat and sugar on food labels when shopping and preparing food. Be aware of what the higher fat and sugar foods are.

**6 Caution with your portions:**  
Do not heap food on your plate (except vegetables). Think twice before having second helpings.

**7 Up on your feet:**  
Break up your sitting time. Stand up for 10 minutes out of every hour.

**8 Think about your drinks:**  
Choose water or sugar free squashes. Unsweetened fruit juice contains natural sugar so limit to one glass a day (200ml: one third of a pint). Alcohol is high in calories so limit to one unit per day for women and two for men. Try diluting your drinks with water, soda or low calorie mixers.

**9 Focus on your food:**  
Slow down. Do not eat on the go or while watching TV. Eat at a table if possible. Enjoy your food.

**10 Do not forget your 5 a day:**  
Eat at least five portions of fruit and vegetables a day (400 g in total). Try something new! Frozen and tinned (in water) count too.

|                                                                                     | Festive food                     | Calorie content | Activity needed to burn calories (mins)                                                   |                                                                                           |
|-------------------------------------------------------------------------------------|----------------------------------|-----------------|-------------------------------------------------------------------------------------------|-------------------------------------------------------------------------------------------|
|                                                                                     |                                  |                 | Walking                                                                                   | Running                                                                                   |
| 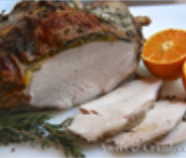   | 1 thick slice roast turkey (60g) | 100             | 16 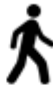    | 8 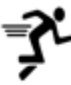     |
| 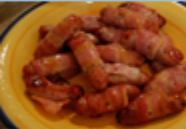   | 5 pigs in blankets               | 70              | 12 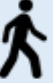    | 6 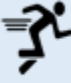     |
| 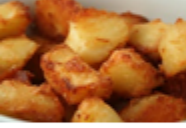   | 3 large roast potatoes (100g)    | 161             | 27 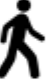    | 14 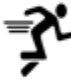    |
| 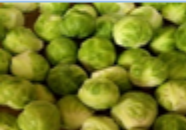   | Brussel sprouts (100g)           | 35              | 6 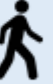     | 3 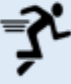     |
| 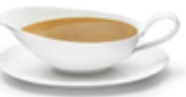   | 5 tbsp gravy (125g)              | 50              | 8 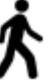     | 4 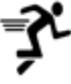     |
| 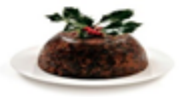 | 1 small Christmas pudding (450g) | 1280            | 210 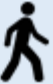 | 110 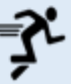 |

These are examples of PACE information of festive foods given to intervention participants. A full list is available on request from corresponding author. PACE information was calculated using the following website based on an 85kg male:

<https://www.bhf.org.uk/informationsupport/support/healthy-living/staying-active/exercise-calorie-calculator>.

We obtained the calorie content of the foods and drinks using McCance and Widdowson's composition of foods integrated dataset

(<https://www.gov.uk/government/publications/composition-of-foods-integrated-dataset-cofid>

## **Supplementary information S2: Comparator healthy lifestyle information**

## **Have a Healthy Lifestyle**

“Being healthy isn’t a fad or a trend, instead it’s a lifestyle”.

Eating well, taking regular exercise and managing the demands of everyday life will help you to achieve a healthy lifestyle and in turn, enjoy better health.

### **Eating**

What you eat, and how much, is very important. Having a healthy diet will help you to maintain a healthy weight, reduce your risk of developing type 2 diabetes, high blood pressure and high cholesterol and reduce your risk of developing coronary heart disease and some cancers.

#### **What do I need to eat for my health?**

A balanced diet is recommended for good health. This means you need to eat a wide variety of foods in the right amounts to give your body what it needs. For a balanced diet you should eat:

- plenty of fruit and vegetables,
- plenty of bread, rice, potatoes, pasta and other starchy foods (choose wholegrain varieties)
- some milk and dairy foods
- some meat, fish, eggs, beans and other non-dairy sources of protein
- just a small amount of food and drink high in fat and/or sugar

### **Sugar**

Too much sugar can lead to the build-up of harmful fat on the inside of our bodies, often around our organs, which is damaging to health. Having a lot of this fat stored in the body can cause serious diseases, such as type 2 diabetes and heart disease. Eating too much sugar can also cause tooth decay.

### **Fat**

There are different kinds of fat in the food we eat – saturated and unsaturated fat. We need some fat to help our bodies absorb vitamins and stay healthy but we shouldn't have too much, especially of saturated fat as this can raise our cholesterol, leading to serious problems such as a heart attack or stroke.

### **Salt**

Many of us in the UK eat too much salt. Too much salt can raise your blood pressure, which puts you at increased risk of health problems, such as heart disease and stroke. Adults should eat no more than 6g of salt a day – that's around one teaspoon. Children should eat less than this.

Much of the salt we eat isn't added at the table – 75% of the salt we eat is already in everyday foods including bread, breakfast cereal and ready meals.

### **Smoking**

Smoking is the most damaging thing you can do to your health. From the day-to-day effects on your heart and your breathing, to longer-term smoking-related diseases such as heart disease, cancer and stroke, the consequences are severe. Your smoke can also harm your family's health, too.

No matter how long you've smoked for, quitting can help improve your health straight away. Curb those nicotine cravings and improve your chances of quitting with stop smoking aids. Remember, there are plenty of treatments out there and they can give you the extra support you need to kick the habit for good. Many smokers also find e-cigarettes a helpful way to manage their cravings.

### **Alcohol**

Men and women are advised not to drink more than 14 units of alcohol a week. This is the same as 6 pints of average strength beer a week. If you regularly drink above the lower risk guidelines, cutting back on alcohol can help your general wellbeing. From weight gain to increasing your risk of cancer, alcohol can have serious effects on your body. Once you start cutting back, you may quickly find you have more energy and feel less tired during the day as well as seeing improvements to your general health.

### **Physical Activity**

Being active is really good for your body, mind and health. If you aren't very active and spend long periods of time sitting (being sedentary) you increase your risk of developing serious conditions, including heart disease, type 2 diabetes and some cancers.

### **Sleep**

Good-quality sleep is more important than the amount of sleep that you get and it helps to keep you feeling healthy. The odd bad night's sleep can make you feel tired and irritable the next day, but it won't harm your health. However, regular poor-quality sleep can have a huge effect on your health, putting you at risk of developing serious medical conditions and can affect your body, thoughts, emotions and behaviour.

Sleep provides you with a boost to your energy and immune system, helping your body recover from illnesses. While you sleep your body builds and repairs itself by making new tissue. Sleep helps your brain to recover and revive itself, helping it to make sense of the day, storing your memories and creating new ideas. Sleep allows your mind to unwind and de-stress and this allows your mental and emotional wellbeing to be restored.

There are simple things you can do to help you wind down and prepare for bed. Think about setting a bedtime routine where you wind down ready for sleep and go to bed at a set time. Remove distractions, like

your TV, computer and phone, from your bedroom. Avoid caffeine, nicotine, and alcohol too close to bedtime as they can keep you awake.

**Stress**

Lots of things can cause stress, including work, relationships and money problems. Stress can affect how you feel, think, behave and how your body works – ranging from how well you sleep to your immune system. In the short-term that's not really a bad thing, but long-term stress puts your health at risk. Reducing your stress levels and feeling more in control boosts your mood and means you are more able to cope with life's ups and downs. Getting stress under control supports your immune system and helps prevent serious health problems, such as high blood pressure and heart disease. There's no quick-fix cure for stress, but there are simple things you can do to help you stress less. These include relaxing, exercising, eating a healthy and balanced diet, and talking to someone.

Source: Public Health England, ONEYOU

**Supplementary information S3: Table S3. Baseline health behaviour characteristics of participants according to randomisation group.**

| <b>Table S3: Baseline health behaviour characteristics of participants according to randomisation group<sup>1</sup></b> |                                     |                                     |                                       |
|-------------------------------------------------------------------------------------------------------------------------|-------------------------------------|-------------------------------------|---------------------------------------|
|                                                                                                                         | <b>All participants<br/>(n=272)</b> | <b>Comparator group<br/>(n=136)</b> | <b>Intervention group<br/>(n=136)</b> |
| <b>Cognitive restraint score: mean (SD)</b>                                                                             | 13.5 (3.14)                         | 14 (3.16)                           | 13.1 (3.05)                           |
| <b>Attending commercial weight management programme during study: n (%)</b>                                             |                                     |                                     |                                       |
| Yes                                                                                                                     | 25 (9.2)                            | 12 (8.8)                            | 13 (9.6)                              |
| <b>Celebrating religious and/or social occasions i.e., Christmas: n (%)</b>                                             |                                     |                                     |                                       |
| Yes                                                                                                                     | 258 (94.9)                          | 128 (94.1)                          | 130 (95.6)                            |
| <b>Alcohol consumption in the last week: n (%)</b>                                                                      |                                     |                                     |                                       |
| Yes                                                                                                                     | 170 (65.6)                          | 90 (70.3)                           | 80 (61.1)                             |
| <b>Weekly physical activity: n (%)</b>                                                                                  |                                     |                                     |                                       |
| None                                                                                                                    | 44 (16.9)                           | 19 (14.8)                           | 25 (18.9)                             |
| Once per week                                                                                                           | 59 (22.7)                           | 29 (22.7)                           | 30 (22.7)                             |
| 2-3 times per week                                                                                                      | 98 (37.7)                           | 53 (41.4)                           | 45 (34.1)                             |
| 4-5 times per week                                                                                                      | 35 (13.5)                           | 16 (12.5)                           | 19 (14.4)                             |
| 6+ times per week                                                                                                       | 24 (9.2)                            | 11 (8.6)                            | 13 (9.9)                              |
| <b>Frequency of self-weighing: n (%)</b>                                                                                |                                     |                                     |                                       |
| Daily                                                                                                                   | 25 (9.2)                            | 13 (9.6)                            | 12 (8.8)                              |
| 6 times a week                                                                                                          | 3 (1.1)                             | 1 (0.7)                             | 2 (1.5)                               |
| 5 times a week                                                                                                          | 3 (1.1)                             | 1 (0.7)                             | 2 (1.5)                               |
| 4 times a week                                                                                                          | 11 (4)                              | 3 (2.2)                             | 8 (5.9)                               |

|                                                              |            |            |            |
|--------------------------------------------------------------|------------|------------|------------|
| 3 times a week                                               | 5 (1.8)    | 3 (2.2)    | 2 (1.5)    |
| Twice a week                                                 | 20 (7.4)   | 9 (6.6)    | 11 (8.1)   |
| Once a week                                                  | 77 (28.3)  | 41 (30.2)  | 36 (26.5)  |
| Less than once a week                                        | 70 (25.7)  | 37 (27.2)  | 33 (24.3)  |
| Never                                                        | 47 (18)    | 22 (16.9)  | 25 (19.1)  |
| <b>Cigarettes smoked per day: n (%)</b>                      |            |            |            |
| None                                                         | 251 (95.8) | 124 (96.1) | 127 (95.5) |
| ≤5                                                           | 4 (1.5)    | 2 (1.6)    | 2 (1.5)    |
| ≥6                                                           | 7 (2.7)    | 3 (2.3)    | 4 (3)      |
| <b>Weight management intentions: n (%)</b>                   |            |            |            |
| Lose weight                                                  | 173 (66.8) | 89 (69)    | 84 (64.6)  |
| Maintain weight                                              | 64 (24.7)  | 33 (25.6)  | 31 (23.8)  |
| Not trying to lose or gain                                   | 22 (8.5)   | 7 (5.4)    | 15 (11.5)  |
| <b>Following a weight loss diet: n (%)</b>                   |            |            |            |
| Yes                                                          | 49 (18.6)  | 24 (18.5)  | 25 (18.8)  |
| <b>Taking prescribed medication to control weight: n (%)</b> |            |            |            |
| Yes                                                          | 1 (0.4)    | 0 (0)      | 1 (0.8)    |

<sup>1</sup> Some variables have missing data due to non-return of questionnaires

**Supplementary information S4: Table S4. Mean follow up times (days)  
per randomisation group per year.**

| Table S4: Mean follow up times (days) per group per year |                             |                               |                                 |
|----------------------------------------------------------|-----------------------------|-------------------------------|---------------------------------|
|                                                          | All participants<br>(n=93)  | Comparator<br>group<br>(n=48) | Intervention<br>group<br>(n=43) |
| Participants in<br>2016. Time in<br>study: mean (SD)     | 42.4 (5.8)                  | 43.5 (6.3)                    | 41.3 (5.3)                      |
|                                                          | All participants<br>(n=179) | Comparator<br>group<br>(n=88) | Intervention<br>group<br>(n=91) |
| Participants in<br>2017. Time in<br>study: mean (SD)     | 46.8 (4.9)                  | 47.2 (5)                      | 46.4 (4.9)                      |
